# Supplementary material for: Diterpenoid compounds from Wedelia trilobata induce resistance to Tomato spotted wilt virus via the JA signal pathway in tobacco plants
Source: PubMed Central journal article supplement (PMC6391457; doi:10.1038/s41598-019-39247-6), 2019-02-26
Supplement: 41598_2019_39247_MOESM1_ESM.pdf [file 41598_2019_39247_MOESM1_ESM.pdf]

1 Supplementary Information

2

3 **Diterpenoid compounds from *Wedelia trilobata* induced**  
4 **resistance to *Tomato spotted wilt virus* via the JA signal**  
5 **pathway on tobacco plants**

6

7 Lihua Zhao<sup>1</sup>, Zhonghui Hu<sup>2</sup>, Shunlin Li<sup>2</sup>, Xueping Zhou<sup>1,3</sup>, Jing Li<sup>4</sup>, Xiaoxia Su<sup>1</sup>, Lizhen Zhang<sup>1</sup>, Zhongkai  
8 Zhang<sup>1</sup>, \*, Jiahong Dong<sup>1</sup>, \*

9

10 <sup>1</sup> Institute of Biotechnology and Germplasm Resources, Yunnan Academy of Agricultural Sciences, Yunnan  
11 Provincial Key Laboratory of Agricultural Biotechnology, Key Lab of Southwestern Crop Gene Resource and  
12 Germplasm Innovation, Ministry of Agriculture, Kunming 650204, China

13 <sup>2</sup> Kunming Institute of Botany, Chinese Academy of Science, Kunming 650201, China

14 <sup>3</sup> Institute of Biotechnology, Zhejiang University, Hangzhou, Zhejiang 310058, China

15 <sup>4</sup> Life Science College, Southwest Forestry University, Kunming 650224, China

16

17 \* Correspondence: Jiahong Dong; Zhongkai Zhang

18 Phone/Fax: +86-870-6512-3133

19 Email: [dongjhn@126.com](mailto:dongjhn@126.com) (J. D.); [zhongkai99@sina.com](mailto:zhongkai99@sina.com) (Z. Z.)

20

21

22

23

24

25

26

27

28

29

30

31

32

33

Supplementary Table 1. The structure of compounds

| Compound number | Compound name                                             | Compound structure |
|-----------------|-----------------------------------------------------------|--------------------|
| 1               | Manglisin A                                               |                    |
| 2               | 32-(Tiglinoyloxy)-162-17-dihydroxy-ent-kauran-19-oil-acid |                    |
| 3               | Manglisin B                                               |                    |
| 6               | Manglisin C                                               |                    |
| 7               | (-)-4,7-aromadendranediol                                 |                    |
| 8               | Manglisin F                                               |                    |
| 9               | Indol-3-carboxylic acid                                   |                    |

13

Manglisin G

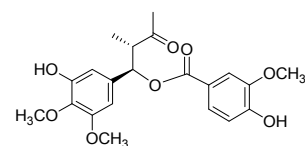

16

Schinlignins B

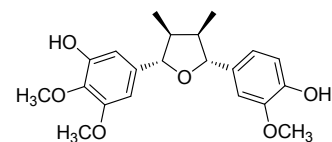

18

Protocatecualdehyde

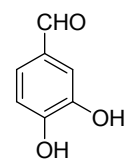

20

32-(Angeloyloxy)-9 $\beta$ -hydroxy-ent-kaur-16-en-19-oil acid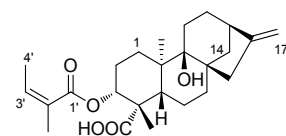

22

Clemaphenol A

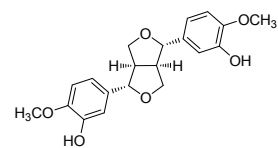

25

Syringylglycerol

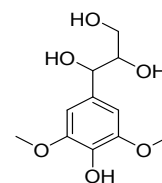

27

Methy caffeoate

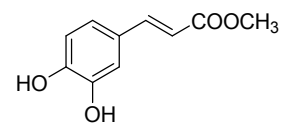

28

16 $\alpha$ -17-dihydroxy-ent-kauran-19-oic acid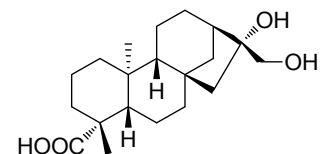

35

36

Supplementary Table 2. Primers of qRT-PCR and VIGS

| Primer           | Sequence (5'-3')                                   | Base pair (bp) | Notes                    |
|------------------|----------------------------------------------------|----------------|--------------------------|
| TSWV-N-F         | GTGAAGAAAGGGAAAGAGTATGCTG                          | 26             | qRT-PCR                  |
|                  | C                                                  |                |                          |
| TSWV-N-R         | GGGGTTAAAAAACAGGCAAACTCAC                          | 26             | qRT-PCR                  |
| TSWV-NSs-F       | TGCTCAAATACAGTCAATGCTAACG                          | 24             | qRT-PCR                  |
| TSWV-NSs-R       | GGAGCTGGAATCGGTCTGTAATAT                           | 24             | qRT-PCR                  |
| TSWV-NSm-F       | ATCTTGATGACCTTATTAGCGTT                            | 22             | qRT-PCR                  |
| TSWV-NSm -R      | GAATGATAGTAGATACAAACCACCA                          | 24             | qRT-PCR                  |
| TSWV-RdRP-F      | CCTTCAACTACAGGTATCCACTTCT                          | 23             | qRT-PCR                  |
| TSWV- RdRP<br>-R | GGATTCTGCATACCCTTGTGA                              | 20             | qRT-PCR                  |
| TSWV-Gn-F        | CTGTGGAAGTTCTGGTCAATAATG                           | 23             | qRT-PCR                  |
| TSWV- Gn -R      | ATATAATCCCAGAAGCCCCAT                              | 19             | qRT-PCR                  |
| QCOI1-F          | TTGTGCCAATTGGGCTTGAC                               | 20             | qRT-PCR                  |
| QCOI1-R          | AGTTGGGACACCTTTGCAGT                               | 20             | qRT-PCR                  |
| VIGCOI1-F        | CCCA <b>A</b> GC <b>T</b> TTTGGGGAATCCGATGAA       | 29             | Bold letters Hind<br>III |
|                  | GGC                                                |                |                          |
| VIGCOI1-R        | <b>C</b> GG <b>A</b> T <b>C</b> CGGCAAGTATATGGGCGG | 28             | Bold letters BamHI       |
|                  | GAT                                                |                |                          |
| M13F             | CAGGAAACAGCTATGAC                                  | 17             |                          |
| M13R             | ACTGGCCGTCGTTTTAC                                  | 17             |                          |
| pTV00F           | CTAGTTCATCTGCACCGCCT                               | 20             | pTV00                    |

38

39

40

41

42

43

44

45

46

47

48

49

50

Supplementary Table 3. Inhibitor rate of genes

---

| Gene names  | Treatment         |                 |                   |                 |
|-------------|-------------------|-----------------|-------------------|-----------------|
|             | Curative effect   |                 | Protective effect |                 |
|             | Inoculated leaves | Systemic leaves | Inoculated leaves | Systemic leaves |
| <i>N</i>    | No effect         | 6.40%           | 11.11%            | 90.14%          |
| <i>NSs</i>  | No effect         | 74.15%          | 11.59%            | 80.12%          |
| <i>Gn</i>   | No effect         | 10.79%          | 13.41%            | 27.91%          |
| <i>NSm</i>  | No effect         | 57.33%          | 29.88%            | 69.61%          |
| <i>RdRp</i> | No effect         | 25.88%          | 46.64%            | 85.05%          |

---

51

52
